# Supplementary material for: Efficient water splitting catalyzed by flexible NiP2 nanosheet array electrodes under both neutral and alkaline solutions
Source: Royal Society of Chemistry journal article supplement (doi:10.1039/c6nj03194c), 2017-01-01
Supplement: c6nj03194c1.pdf [file c6nj03194c1.pdf]

## Electronic Supplementary Information

### Efficient water splitting catalyzed by flexible NiP<sub>2</sub> nanosheet array electrodes under both neutral and alkaline solutions

Zonghua Pu,<sup>a</sup> Ya Xue,<sup>b</sup> Wenqiang Li,<sup>a</sup> Ibrahim Saana Amiinu,<sup>a</sup> and Shichun Mu<sup>a\*</sup>

<sup>a</sup>State Key Laboratory of Advanced Technology for Materials Synthesis and Processing, Wuhan University of Technology, Wuhan 430070, P. R. China

<sup>b</sup>Laboratory of Southwest China Wildlife Resources Conservation, China West Normal University, Nanchong 637009, P. R. China

*E-mail: msc@whut.edu.cn*

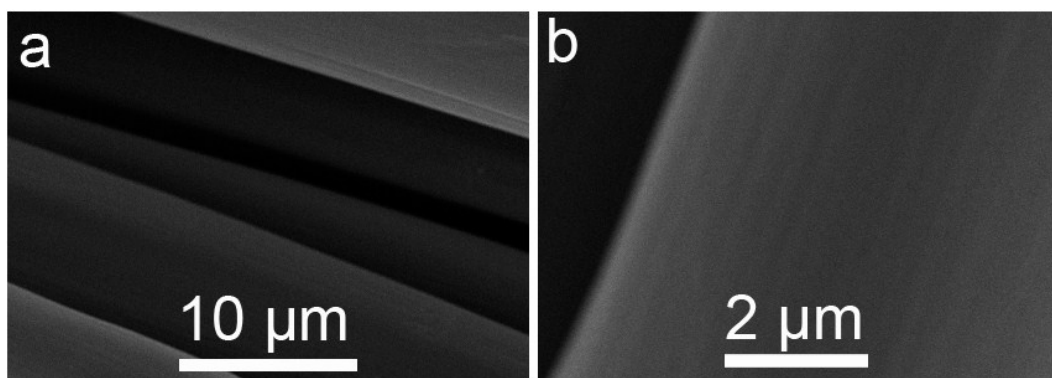

**Fig. S1** SEM image of blank CC.

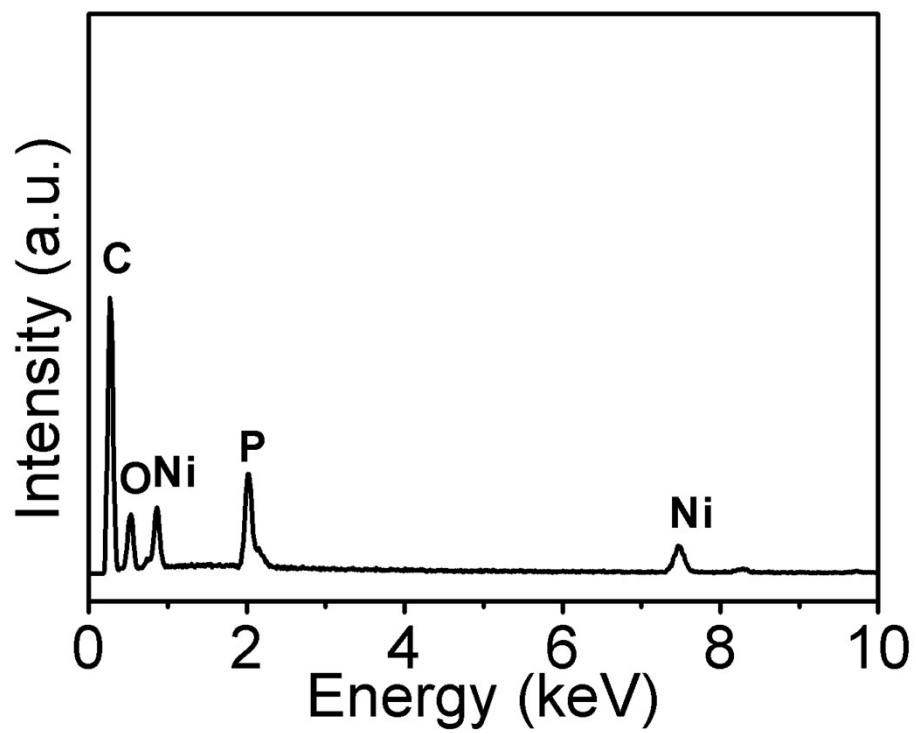

Fig. S2 EDX spectrum of NiP<sub>2</sub>/CC.

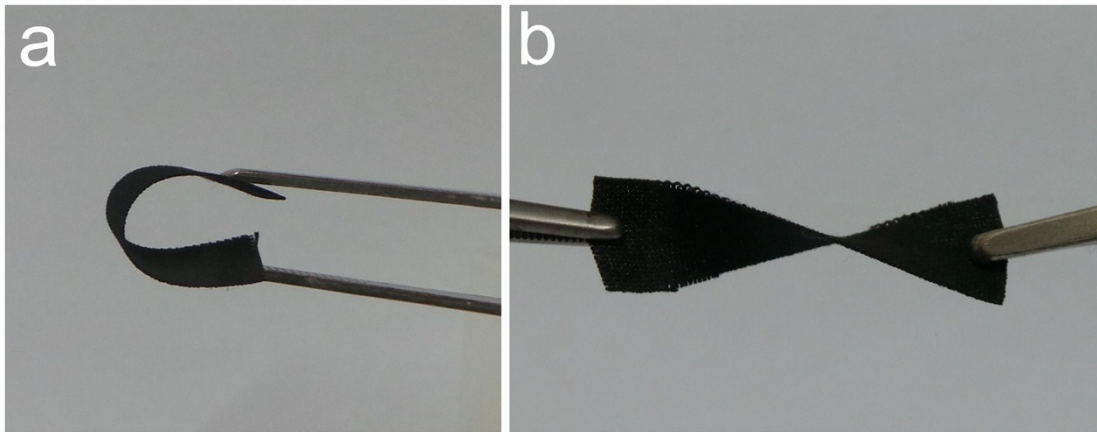

**Fig. S3** Optical photographs of the as-synthesized NiP<sub>2</sub>/CC.

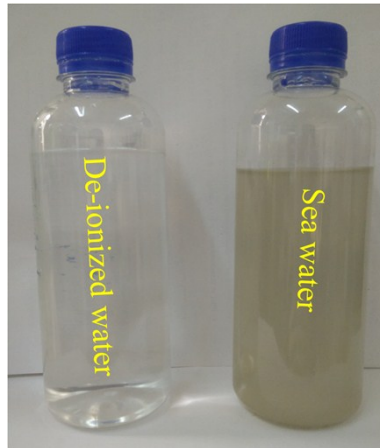

**Fig. S4** Optical photographs of the de-ionized water and seawater.

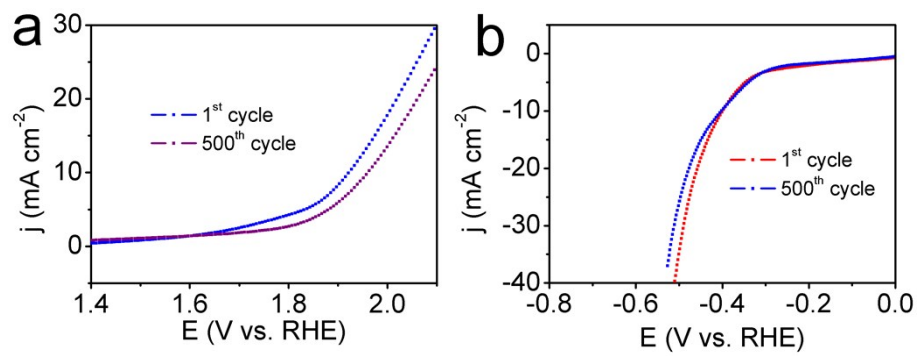

**Fig. S5** (a) OER and (b) HER polarization curves for NiP<sub>2</sub>/CC in seawater.

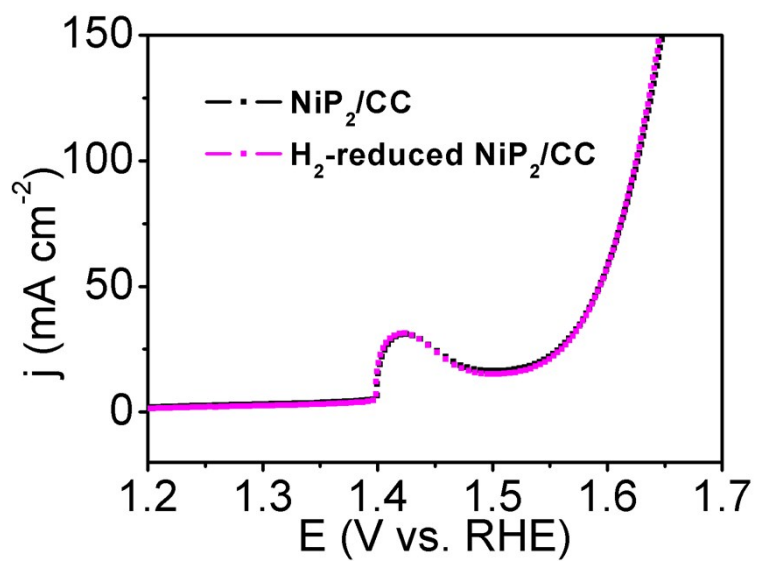

**Fig. S6.** Polarization curves for NiP<sub>2</sub>/CC and H<sub>2</sub>-reduced NiP<sub>2</sub>/CC in 1.0 M KOH at a scan rate of 2 mV s<sup>-1</sup> for OER.

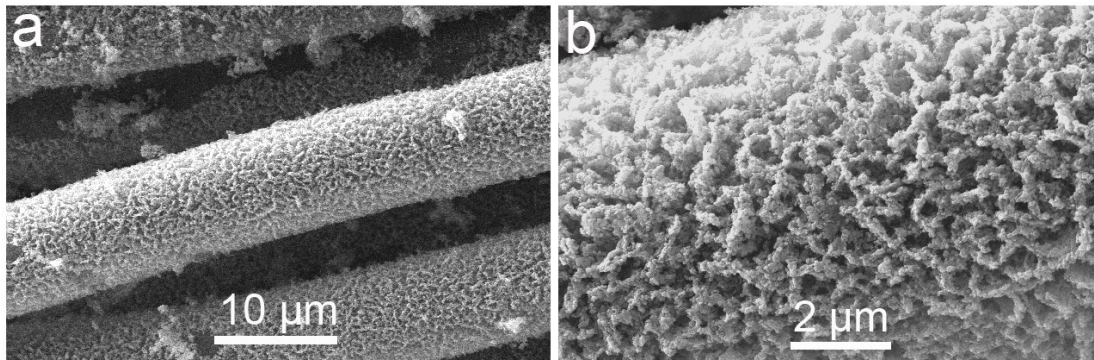

**Fig. S7** SEM images of NiP<sub>2</sub>/CC after OER electrolysis.

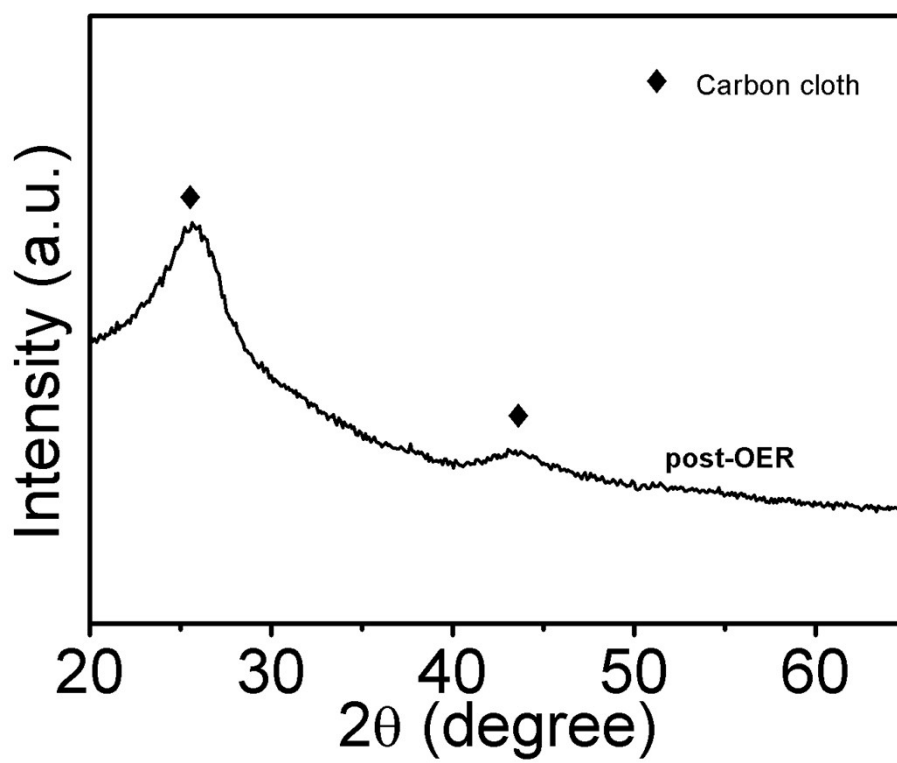

Fig. S8 XRD pattern of NiP<sub>2</sub>/CC post-OER.



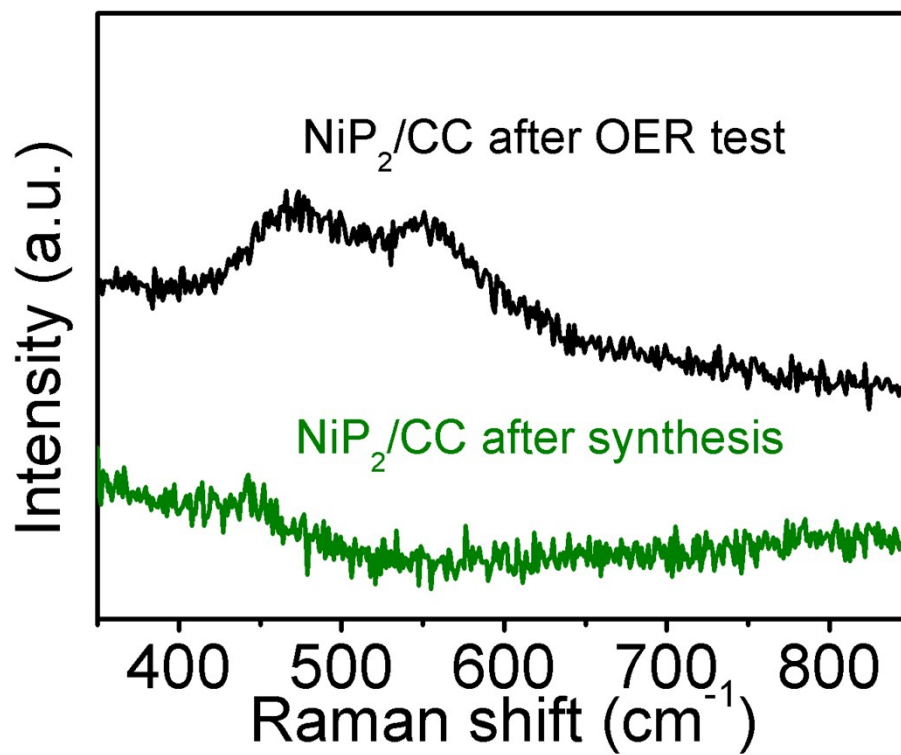

**Fig. S9** Raman spectra for NiP<sub>2</sub>/CC before and after OER durability tests in 1.0 M KOH.

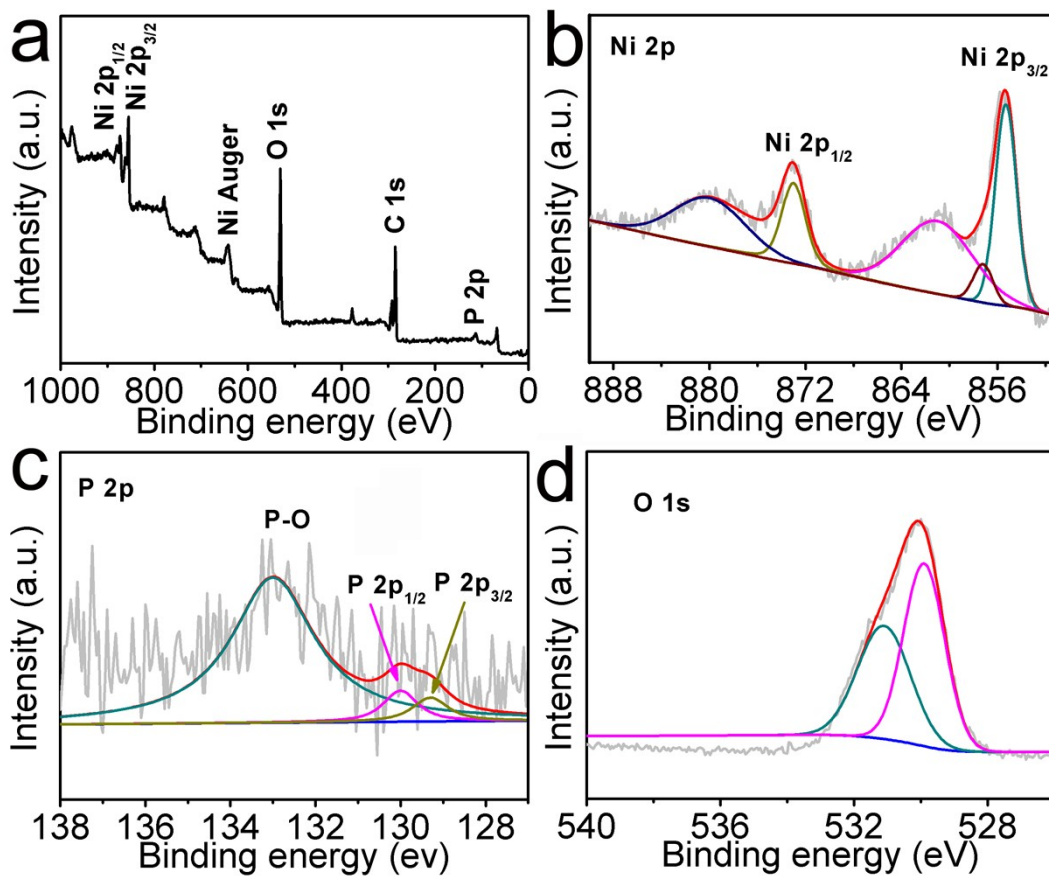

**Fig. S10** (a) XPS survey spectrum for post-OER NiP<sub>2</sub>/CC. XPS spectra for post-OER NiP<sub>2</sub>/CC in the (b) Ni 2p, (c) P 2p, and (d) O 1s regions.

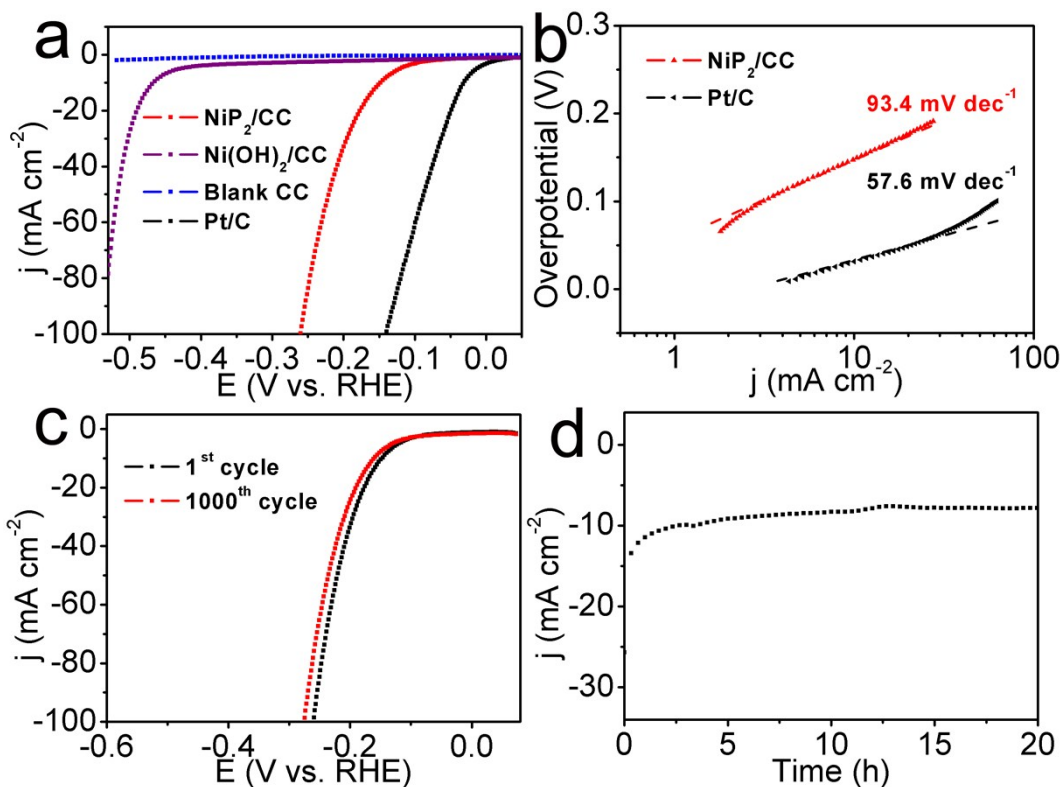

**Fig. S11.** (a) Polarization curves of NiP<sub>2</sub>/CC, Ni(OH)<sub>2</sub>/CC, Pt/C on CC and blank CC in 1.0 M KOH at a scan rate of 2 mV s<sup>-1</sup>. (b) Tafel plots of NiP<sub>2</sub>/CC and Pt/C on CC. (c) Polarization curves recorded for NiP<sub>2</sub>/CC before and after 1000 CV cycles at a scan rate of 2 mV s<sup>-1</sup>. (d) Time-dependent current density curve for NiP<sub>2</sub>/CC under static overpotential of 160 mV for 20 h in 1.0 M KOH (without iR correction).

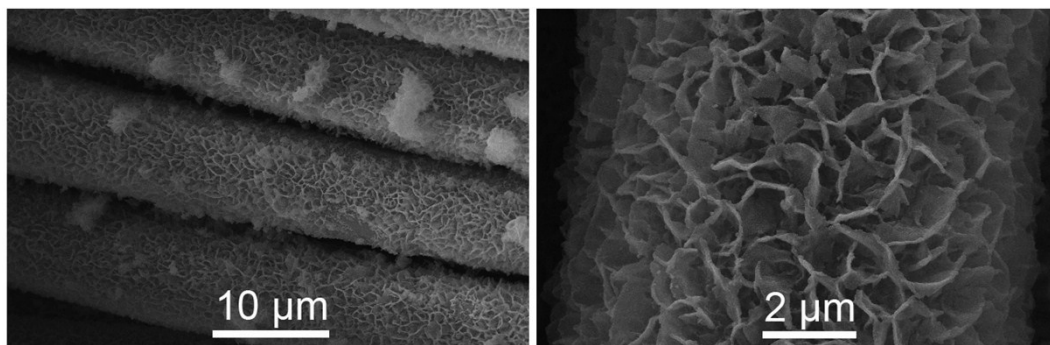

**Fig. S12** SEM images of NiP<sub>2</sub>/CC after HER electrolysis.

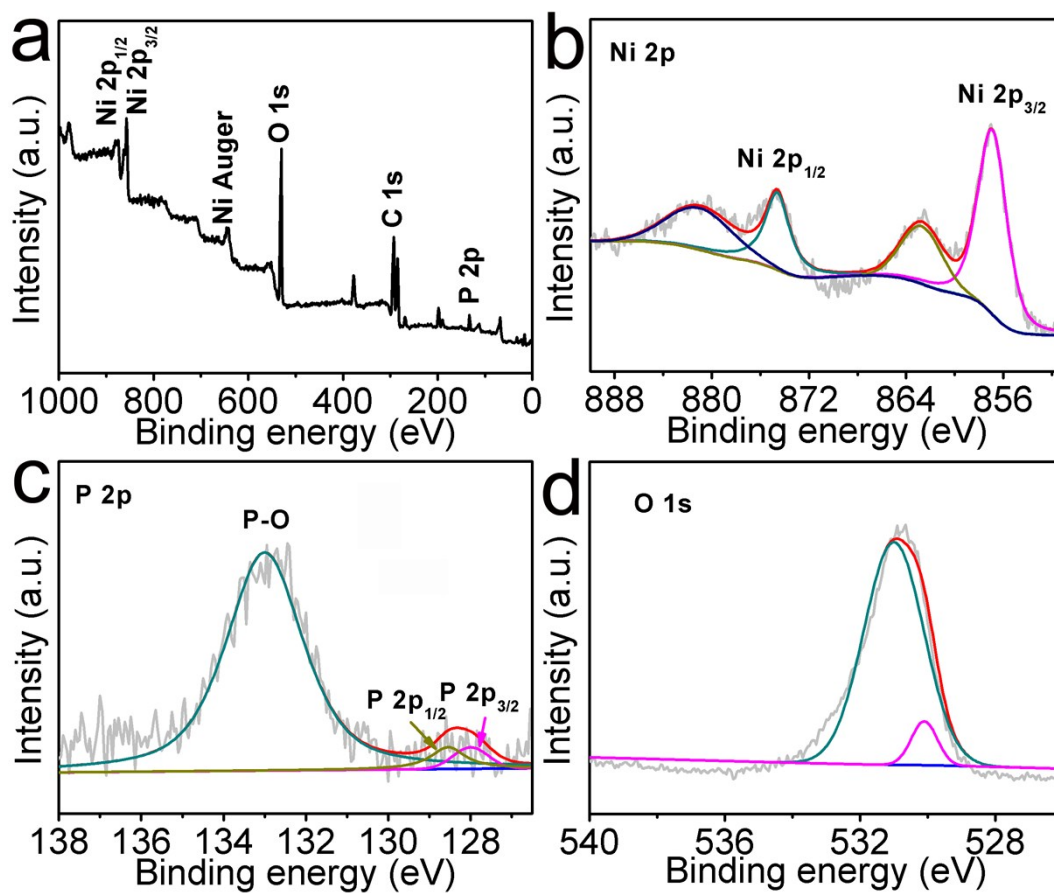

**Fig. S13** (a) XPS survey spectrum for post-HER NiP<sub>2</sub>/CC. XPS spectra for post-HER NiP<sub>2</sub>/CC in the (b) Ni 2p, (c) P 2p, and (d) O 1s regions.

**Table S1** Comparison of OER catalytic activity for well-developed electrocatalysts in neutral media.

| Catalysts                                                           | Electrolyte/pH | j (mA cm <sup>-2</sup> ) @ overpotential (mV) | Ref.      |
|---------------------------------------------------------------------|----------------|-----------------------------------------------|-----------|
| NiP <sub>2</sub> /CC                                                | 1.0 M PBS      | 4.0@570                                       | This work |
| LiCoPO <sub>4</sub>                                                 | 7.0            | 0.5@570                                       | 1         |
| LiMnP <sub>2</sub> O <sub>7</sub>                                   | 7.0            | 0.09@570                                      | 2         |
| Co-Pi                                                               | 6.4            | 0.57@570                                      | 3         |
| Mn <sub>3</sub> (PO <sub>4</sub> ) <sub>2</sub> • 3H <sub>2</sub> O | 7.0            | 0.05@570                                      | 4         |
| Ni-Bi film                                                          | 9.2            | 1.0@540                                       | 5         |
| NiO <sub>x</sub> -MWCNT                                             | 9.2            | 0.5@330                                       | 6         |
| Co <sub>3</sub> O <sub>4</sub> /SWNTS                               | 7.0            | 6.0@570                                       | 7         |
| Fe-based film                                                       | 7.0            | 5.1@570                                       | 8         |
| ZrS <sub>3</sub> nanosheets                                         | 6.9            | 0.025@570                                     | 9         |
| Co-Bi NS                                                            | 7.0            | 5.3@570                                       | 10        |

**Table S2** Comparison of selected nonprecious OER electrocatalysts in alkaline media.

| Catalysts                                                       | Electrolyte | j (mA cm <sup>-2</sup> ) | $\eta$ (mV) at the<br>corresponding j | Ref.      |
|-----------------------------------------------------------------|-------------|--------------------------|---------------------------------------|-----------|
| NiP <sub>2</sub> /CC                                            | 1.0 M KOH   | 20                       | 310                                   | This work |
| NiCo <sub>2</sub> S <sub>4</sub> nanowires/CC                   | 1.0 M KOH   | 20                       | 336                                   | 11        |
| NiSe nanowire/NF                                                | 1.0 M KOH   | 20                       | 270                                   | 12        |
| Ni <sub>2</sub> P nanoparticles                                 | 1.0 M KOH   | 10                       | 290                                   | 13        |
| Ni <sub>3</sub> P <sub>4</sub> /Ni plate                        | 1.0 M KOH   | 10                       | 290                                   | 14        |
| Ni <sub>3</sub> S <sub>2</sub> nanosheet/NF                     | 1.0 M KOH   | 10                       | 260                                   | 15        |
| urchin-like Ni <sub>2</sub> P/NF                                | 1.0 M KOH   | 10                       | 200                                   | 16        |
| Co-S/Ti mesh                                                    | 1.0 M KOH   | 10                       | 340                                   | 17        |
| Co-P film                                                       | 1.0 M KOH   | 10                       | 345                                   | 18        |
| Co <sub>3</sub> O <sub>4</sub> /rm-GO                           | 1.0 M KOH   | 10                       | 310                                   | 19        |
| NiFeO <sub>x</sub> film                                         | 1.0 M NaOH  | 10                       | N/A                                   | 20        |
| Zn <sub>x</sub> Co <sub>3-x</sub> O <sub>4</sub> nanowire array | 1.0 M KOH   | 10                       | 320                                   | 21        |
| Ni <sub>x</sub> Co <sub>3-x</sub> O <sub>4</sub> nanowire array | 1.0 M KOH   | 10                       | 370                                   | 22        |
| N-doped graphene-CoO                                            | 1.0 M KOH   | 10                       | 340                                   | 23        |
| CoCo LDH                                                        | 1.0 M KOH   | 10                       | 393                                   | 24        |
| CoMn LDH                                                        | 1.0 M KOH   | 10                       | 324                                   | 25        |
| NiCo LDH                                                        | 1.0 M KOH   | 10                       | 367                                   | 26        |
| CoO <sub>x</sub> film                                           | 1.0 M KOH   | 10                       | 403                                   | 27        |
| Cu-N-C/graphene                                                 | 0.1 M KOH   | 10                       | N/A                                   | 28        |

**Table S3** Comparison of electrocatalytic performance of the NiP<sub>2</sub>/CC with other previously reported electrocatalysts for overall water splitting in a two-electrode cell.

| Catalyst                                   | Electrolyte | Voltage@10 mA cm <sup>-2</sup><br>(V) | Ref.      |
|--------------------------------------------|-------------|---------------------------------------|-----------|
| NiP <sub>2</sub> /CC                       | 1.0 M KOH   | 1.65                                  | This work |
| NiCo <sub>2</sub> S <sub>4</sub> nanowires | 1.0 M KOH   | 1.68                                  | 11        |
| NiSe nanowire/NF                           | 1.0 M KOH   | 1.63                                  | 12        |
| Ni <sub>2</sub> P nanoparticles            | 1.0 M KOH   | 1.63                                  | 13        |
| Ni <sub>5</sub> P <sub>4</sub> /Ni plate   | 1.0 M KOH   | 1.7                                   | 14        |
| urchin-like Ni <sub>2</sub> P/NF           | 1.0 M KOH   | 1.49                                  | 16        |
| Co-P film                                  | 1.0 M KOH   | 1.65                                  | 18        |
| CoP                                        | 1.0 M KOH   | 1.587                                 | 29        |
| CoSe                                       | 1.0 M KOH   | 1.65                                  | 30        |
| NiMo alloy                                 | 1.0 M KOH   | 1.64                                  | 31        |
| PNC/Co                                     | 1.0 M KOH   | 1.64                                  | 32        |
| Co-P/NC                                    | 1.0 M KOH   | 1.7                                   | 33        |
| CoOx@CN                                    | 1.0 M KOH   | 1.55@20mA cm <sup>-2</sup>            | 34        |
| CoP nanoneedle arrays                      | 1.0 M KOH   | ~1.62                                 | 35        |
| NiSe <sub>2</sub> /Ti                      | 1.0 M KOH   | 1.66                                  | 36        |



**Movie S1** This movie shows hydrogen and oxygen evolution on NiP<sub>2</sub>/CC electrodes in a two-electrode setup driven by a ~1.5 V AA battery in 1.0 M KOH.

## References

1. S. W. Lee, C. Carlton, M. Risch, Y. Surendranath, S. Chen, S. Furutsuki, A. Yamada, D. G. Nocera and Y. Shao-Horn, *J. Am. Chem. Soc.*, 2012, **134**, 16959-16962.
2. J. Park, H. Kim, K. Jin, B. J. Lee, Y.-S. Park, H. Kim, I. Park, K. D. Yang, H.-Y. Jeong, J. Kim, K. T. Hong, H. W. Jang, K. Kang and K. T. Nam, *J. Am. Chem. Soc.*, 2014, **136**, 4201-4211.
3. H. S. Ahn and T. D. Tilley, *Adv. Funct. Mater.*, 2013, **23**, 227-233.
4. K. Jin, J. Park, J. Lee, K. D. Yang, G. K. Pradhan, U. Sim, D. Jeong, H. L. Jang, S. Park, D. Kim, N.-E. Sung, S. H. Kim, S. Han and K. T. Nam, *J. Am. Chem. Soc.*, 2014, **136**, 7435-7443.
5. M. Dincă, Y. Surendranath and D. G. Nocera, *Proc. Natl. Acad. Sci.*, 2010, **107**, 10337-10341.
6. X. Yu, T. Hua, X. Liu, Z. Yan, P. Xu and P. Du, *ACS Appl. Mater. Interfaces*, 2014, **6**, 15395-15402.
7. J. Wu, Y. Xue, X. Yan, W. Yan, Q. Cheng and Y. Xie, *Nano Res.*, 2012, **5**, 521-530.
8. M. Chen, Y. Wu, Y. Han, X. Lin, J. Sun, W. Zhang and R. Cao, *ACS Appl. Mat. Interfaces*, 2015, **7**, 21852-21859.
9. J. Xie, R. Wang, J. Bao, X. Zhang, H. Zhang, S. Li and Y. Xie, *Inorg. Chem. Front.*, 2014, **1**, 751-756.
10. P. Chen, K. Xu, T. Zhou, Y. Tong, J. Wu, H. Cheng, X. Lu, H. Ding, C. Wu and Y. Xie, *Angew. Chem. Int. Ed.*, 2016, **128**, 2534-2538.
11. D. Liu, Q. Lu, Y. Luo, X. Sun and A. M. Asiri, *Nanoscale*, 2015, **7**, 15122-15126.

12. C. Tang, N. Cheng, Z. Pu, W. Xing and X. Sun, *Angew. Chem. Int. Ed.*, 2015, **54**, 9351-9355.
13. L. A. Stern, L. Feng, F. Song and X. Hu, *Energy Environ. Sci.*, 2015, **8**, 2347-2351.
14. M. Ledendecker, S. K. Calderon, C. Papp, H. P. Steinrück, M. Antonietti and M. Shalom, *Angew. Chem. Int. Ed.*, 2015, **54**, 12361-12365.
15. L. Feng, G. Yu, Y. Wu, G. Li, H. Li, Y. Sun, T. Asefa, W. Chen and X. Zou, *J. Am. Chem. Soc.*, 2015, **137**, 14023-14026.
16. B. You, N. Jiang, M. Sheng, M. W. Bhushan and Y. Sun, *ACS Catal.*, 2016, **6**, 714-721.
17. T. Liu, Y. Liang, Q. Liu, X. Sun, Y. He and A. M. Asiri, *Electrochem. Commun.*, 2015, **60**, 92-96.
18. N. Jiang, B. You, M. Sheng, Y. Sun, *Angew. Chem. Int. Ed.*, 2015, **54**, 6251-6254.
19. Y. Liang, Y. Li, H. Wang, J. Zhou, J. Wang, T. Regier and H. Dai, *Nat. Mater.*, 2011, **10**, 780-786.
20. C. McCrory, S. Jung, J. Peters and T. Jaramillo, *J. Am. Chem. Soc.*, 2013, **135**, 16977-16987.
21. X. Liu, Z. Chang, L. Luo, T. Xu, X. Lei, J. Liu and X. Sun, *Chem. Mater.*, 2014, **6**, 1889-1895.
22. Y. Li, P. Hasin and Y. Wu, *Adv. Mater.*, 2010, **22**, 1926-1929.
23. S. Mao, Z. Wen, T. H. Hou and J. Chen, *Energy Environ. Sci.*, 2014, **7**, 609-616.
24. F. Song and X. Hu, *Nat. Commun.*, 2014, **5**, 4477-4483.
25. F. Song and X. Hu, *J. Am. Chem. Soc.*, 2014, **136**, 16481-16484.
26. H. Liang, F. Meng, M. Acevedo, L. Li, A. Forticaus, L. Xiu, Z. Wang and S. Jin, *Nano Lett.*, 2015, **15**, 1421-1427.
27. L. Trotochaud, J. K. Ranney, K. N. Williams and S. W. Boettcher, *J. Am. Chem. Soc.*, 2012,

134, 17253-17261.

28. J. Wang, K. Wang, F. Wang and X. Xia, *Nat. Commun.*, 2014, **5**, 5285.
29. J. Chang, Y. Xiao, M. Xiao, J. Ge, C. Liu and W. Xing, *ACS Catal.*, 2015, **5** 6874-6878.
30. T. Liu, Q. Liu, A.M. Asiri, Y. Luo and X. Sun, *Chem. Commun.*, 2015, **51**, 16683-16686.
31. J. Tian, N. Cheng, Q. Liu, X. Sun, Y. He and A. M. Asiri, *J. Mater. Chem. A*, 2015, **3**, 20056-20059.
32. X. Li, Z. Niu, J. Jiang and L. Ai, *J. Mater. Chem. A*, 2016, **4**, 3204-3209.
33. B. You, N. Jiang, M. Sheng, S. Gu, J. Yano and Y. Sun, *Chem. Mater.*, 2015, **27**, 7636-7642.
34. H. Jin, J. Wang, D. Su, Z. Wei, Z. Pang and Y. Wang, *J. Am. Chem. Soc.*, 2015, **137**, 2688-2694.
35. P. Wang, F. Song, R. Amal, Y. H. Ng and X. Hu, *ChemSusChem*, 2016, **9**, 472-477.
36. Z. Pu, Y. Luo, A. M. Asiri and X. Sun, *ACS Appl. Mater. Interfaces*, 2016, **8**, 4718-4723.
